# Supplementary material for: Identification and Development of Subtypes With Poor Prognosis in Pan-Gynecological Cancer Based on Gene Expression in the Glycolysis-Cholesterol Synthesis Axis
Source: Front Oncol. 2021 Mar 24;11:636565. doi: 10.3389/fonc.2021.636565 (PMC8025671; doi:10.3389/fonc.2021.636565)
Supplement: Supplementary file 10 [file Table_10.XLSX]

## Sheet: Pathway_samples
Samples	Cancer
TCGA-04-1331-01	OV
TCGA-04-1356-01	OV
TCGA-04-1514-01	OV
TCGA-04-1536-01	OV
TCGA-09-0366-01	OV
TCGA-09-0369-01	OV
TCGA-09-1659-01	OV
TCGA-09-1666-01	OV
TCGA-09-1668-01	OV
TCGA-09-2045-01	OV
TCGA-09-2048-01	OV
TCGA-09-2056-01	OV
TCGA-10-0931-01	OV
TCGA-10-0936-01	OV
TCGA-10-0937-01	OV
TCGA-13-0725-01	OV
TCGA-13-0762-01	OV
TCGA-13-0804-01	OV
TCGA-13-0885-01	OV
TCGA-13-0886-01	OV
TCGA-13-0893-01	OV
TCGA-13-0897-01	OV
TCGA-13-0900-01	OV
TCGA-13-1404-01	OV
TCGA-13-1483-01	OV
TCGA-13-1489-01	OV
TCGA-13-1498-01	OV
TCGA-13-1510-01	OV
TCGA-20-0991-01	OV
TCGA-20-1682-01	OV
TCGA-20-1687-01	OV
TCGA-23-1022-01	OV
TCGA-23-1023-01	OV
TCGA-23-1024-01	OV
TCGA-23-1120-01	OV
TCGA-24-0966-01	OV
TCGA-24-1419-01	OV
TCGA-24-1430-01	OV
TCGA-24-1431-01	OV
TCGA-24-1435-01	OV
TCGA-24-1558-01	OV
TCGA-24-1563-01	OV
TCGA-24-1616-01	OV
TCGA-24-1845-01	OV
TCGA-24-1846-01	OV
TCGA-24-1923-01	OV
TCGA-24-1930-01	OV
TCGA-24-2293-01	OV
TCGA-25-1313-01	OV
TCGA-25-1316-01	OV
TCGA-25-2409-01	OV
TCGA-29-1693-01	OV
TCGA-29-1694-01	OV
TCGA-29-1701-01	OV
TCGA-29-1711-01	OV
TCGA-29-1761-01	OV
TCGA-29-1768-01	OV
TCGA-29-1769-01	OV
TCGA-29-1776-01	OV
TCGA-29-1785-01	OV
TCGA-29-2427-01	OV
TCGA-30-1714-01	OV
TCGA-30-1857-01	OV
TCGA-36-1570-01	OV
TCGA-36-1574-01	OV
TCGA-57-1584-01	OV
TCGA-59-2355-01	OV
TCGA-61-1725-01	OV
TCGA-61-1728-01	OV
TCGA-61-1737-01	OV
TCGA-61-1738-01	OV
TCGA-61-1907-01	OV
TCGA-61-1914-01	OV
TCGA-61-1918-01	OV
TCGA-61-1998-01	OV
TCGA-61-2104-01	OV
TCGA-61-2111-01	OV
TCGA-VG-A8LO-01	OV
TCGA-04-1341-01	OV
TCGA-09-2054-01	OV
TCGA-13-0768-01	OV
TCGA-13-0883-01	OV
TCGA-13-1408-01	OV
TCGA-13-1492-01	OV
TCGA-13-1509-01	OV
TCGA-23-1111-01	OV
TCGA-23-1119-01	OV
TCGA-23-1122-01	OV
TCGA-23-1809-01	OV
TCGA-23-2078-01	OV
TCGA-24-0979-01	OV
TCGA-24-1105-01	OV
TCGA-24-1418-01	OV
TCGA-24-1424-01	OV
TCGA-24-1425-01	OV
TCGA-24-1427-01	OV
TCGA-24-1434-01	OV
TCGA-24-1469-01	OV
TCGA-24-1544-01	OV
TCGA-24-1549-01	OV
TCGA-24-1550-01	OV
TCGA-24-1551-01	OV
TCGA-24-1552-01	OV
TCGA-24-1560-01	OV
TCGA-24-1603-01	OV
TCGA-24-1604-01	OV
TCGA-24-1843-01	OV
TCGA-24-1850-01	OV
TCGA-24-1924-01	OV
TCGA-24-1928-01	OV
TCGA-24-2261-01	OV
TCGA-24-2267-01	OV
TCGA-24-2289-01	OV
TCGA-24-2298-01	OV
TCGA-25-1317-01	OV
TCGA-25-1318-01	OV
TCGA-25-1319-01	OV
TCGA-25-1320-01	OV
TCGA-25-1321-01	OV
TCGA-25-1323-01	OV
TCGA-25-1328-01	OV
TCGA-25-1623-01	OV
TCGA-25-1877-01	OV
TCGA-29-1695-01	OV
TCGA-29-1703-01	OV
TCGA-29-1710-01	OV
TCGA-29-2414-01	OV
TCGA-30-1718-01	OV
TCGA-30-1862-01	OV
TCGA-31-1951-01	OV
TCGA-36-1571-01	OV
TCGA-36-1577-01	OV
TCGA-36-1580-01	OV
TCGA-57-1582-01	OV
TCGA-57-1993-01	OV
TCGA-57-1994-01	OV
TCGA-59-2351-01	OV
TCGA-61-1910-01	OV
TCGA-61-1995-01	OV
TCGA-61-2092-01	OV
TCGA-61-2097-01	OV
TCGA-61-2101-01	OV
TCGA-61-2109-01	OV
TCGA-61-2110-01	OV
TCGA-61-2113-01	OV
TCGA-WR-A838-01	OV
TCGA-04-1343-01	OV
TCGA-04-1365-01	OV
TCGA-04-1530-01	OV
TCGA-04-1651-01	OV
TCGA-09-0367-01	OV
TCGA-09-1662-01	OV
TCGA-09-1669-01	OV
TCGA-09-1670-01	OV
TCGA-09-2044-01	OV
TCGA-09-2051-01	OV
TCGA-10-0928-01	OV
TCGA-13-0714-01	OV
TCGA-13-0720-01	OV
TCGA-13-0726-01	OV
TCGA-13-0727-01	OV
TCGA-13-0730-01	OV
TCGA-13-0765-01	OV
TCGA-13-0766-01	OV
TCGA-13-0797-01	OV
TCGA-13-0887-01	OV
TCGA-13-0891-01	OV
TCGA-13-0905-01	OV
TCGA-13-0906-01	OV
TCGA-13-0911-01	OV
TCGA-13-0916-01	OV
TCGA-13-0924-01	OV
TCGA-13-1403-01	OV
TCGA-13-1405-01	OV
TCGA-13-1410-01	OV
TCGA-13-1488-01	OV
TCGA-13-1495-01	OV
TCGA-13-1496-01	OV
TCGA-13-1497-01	OV
TCGA-13-1501-01	OV
TCGA-13-1506-01	OV
TCGA-13-1511-01	OV
TCGA-13-1512-01	OV
TCGA-13-A5FT-01	OV
TCGA-20-0987-01	OV
TCGA-20-1683-01	OV
TCGA-23-1021-01	OV
TCGA-23-1026-01	OV
TCGA-23-1027-01	OV
TCGA-23-1028-01	OV
TCGA-23-1107-01	OV
TCGA-23-1110-01	OV
TCGA-23-1113-01	OV
TCGA-23-1118-01	OV
TCGA-23-2084-01	OV
TCGA-24-0970-01	OV
TCGA-24-1103-01	OV
TCGA-24-1104-01	OV
TCGA-24-1413-01	OV
TCGA-24-1416-01	OV
TCGA-24-1417-01	OV
TCGA-24-1423-01	OV
TCGA-24-1428-01	OV
TCGA-24-1546-01	OV
TCGA-24-1557-01	OV
TCGA-24-1562-01	OV
TCGA-24-1842-01	OV
TCGA-24-1847-01	OV
TCGA-24-2023-01	OV
TCGA-24-2027-01	OV
TCGA-24-2262-01	OV
TCGA-24-2271-01	OV
TCGA-24-2281-01	OV
TCGA-24-2288-01	OV
TCGA-24-2290-01	OV
TCGA-24-2297-01	OV
TCGA-25-1315-01	OV
TCGA-25-1322-01	OV
TCGA-25-1326-01	OV
TCGA-25-1329-01	OV
TCGA-25-1627-01	OV
TCGA-25-1630-01	OV
TCGA-25-1631-01	OV
TCGA-25-1635-01	OV
TCGA-25-2042-01	OV
TCGA-25-2391-01	OV
TCGA-25-2393-01	OV
TCGA-25-2396-01	OV
TCGA-25-2400-01	OV
TCGA-25-2401-01	OV
TCGA-25-2404-01	OV
TCGA-29-1688-01	OV
TCGA-29-1696-01	OV
TCGA-29-1697-01	OV
TCGA-29-1705-01	OV
TCGA-29-1762-01	OV
TCGA-29-1763-01	OV
TCGA-29-1770-01	OV
TCGA-29-1777-01	OV
TCGA-29-1781-01	OV
TCGA-29-1784-01	OV
TCGA-29-2428-01	OV
TCGA-30-1860-01	OV
TCGA-30-1861-01	OV
TCGA-30-1891-01	OV
TCGA-30-1892-01	OV
TCGA-31-1944-01	OV
TCGA-31-1946-01	OV
TCGA-31-1950-01	OV
TCGA-31-1953-01	OV
TCGA-31-1959-01	OV
TCGA-36-1568-01	OV
TCGA-36-1581-01	OV
TCGA-57-1583-01	OV
TCGA-57-1585-01	OV
TCGA-59-2348-01	OV
TCGA-59-2350-01	OV
TCGA-59-2354-01	OV
TCGA-59-2363-01	OV
TCGA-59-A5PD-01	OV
TCGA-61-1724-01	OV
TCGA-61-1736-01	OV
TCGA-61-2000-01	OV
TCGA-61-2002-01	OV
TCGA-61-2003-01	OV
TCGA-61-2008-01	OV
TCGA-61-2012-01	OV
TCGA-04-1332-01	OV
TCGA-04-1338-01	OV
TCGA-04-1347-01	OV
TCGA-04-1350-01	OV
TCGA-04-1361-01	OV
TCGA-04-1362-01	OV
TCGA-04-1364-01	OV
TCGA-04-1519-01	OV
TCGA-04-1542-01	OV
TCGA-04-1648-01	OV
TCGA-04-1655-01	OV
TCGA-09-0364-01	OV
TCGA-09-1661-01	OV
TCGA-09-1665-01	OV
TCGA-09-1667-01	OV
TCGA-09-1673-01	OV
TCGA-09-2053-01	OV
TCGA-10-0927-01	OV
TCGA-10-0933-01	OV
TCGA-10-0938-01	OV
TCGA-13-0724-01	OV
TCGA-13-0795-01	OV
TCGA-13-0800-01	OV
TCGA-13-0884-01	OV
TCGA-13-0888-01	OV
TCGA-13-0901-01	OV
TCGA-13-0908-01	OV
TCGA-13-0920-01	OV
TCGA-13-0923-01	OV
TCGA-13-1407-01	OV
TCGA-13-1409-01	OV
TCGA-13-1411-01	OV
TCGA-13-1477-01	OV
TCGA-13-1485-01	OV
TCGA-13-1487-01	OV
TCGA-13-1499-01	OV
TCGA-13-1505-01	OV
TCGA-13-1507-01	OV
TCGA-13-2060-01	OV
TCGA-20-1686-01	OV
TCGA-23-1029-01	OV
TCGA-23-1030-01	OV
TCGA-23-1109-01	OV
TCGA-23-1114-01	OV
TCGA-23-1116-01	OV
TCGA-23-1123-01	OV
TCGA-23-2077-01	OV
TCGA-24-0982-01	OV
TCGA-24-1422-01	OV
TCGA-24-1426-01	OV
TCGA-24-1464-01	OV
TCGA-24-1467-01	OV
TCGA-24-1470-01	OV
TCGA-24-1471-01	OV
TCGA-24-1474-01	OV
TCGA-24-1553-01	OV
TCGA-24-1565-01	OV
TCGA-24-1567-01	OV
TCGA-24-1844-01	OV
TCGA-24-2020-01	OV
TCGA-24-2024-01	OV
TCGA-24-2026-01	OV
TCGA-24-2033-01	OV
TCGA-24-2035-01	OV
TCGA-24-2036-01	OV
TCGA-24-2038-01	OV
TCGA-24-2254-01	OV
TCGA-24-2280-01	OV
TCGA-25-1312-01	OV
TCGA-25-1626-01	OV
TCGA-25-1628-01	OV
TCGA-25-1632-01	OV
TCGA-25-1633-01	OV
TCGA-25-1634-01	OV
TCGA-25-1870-01	OV
TCGA-25-2392-01	OV
TCGA-25-2398-01	OV
TCGA-25-2399-01	OV
TCGA-29-1690-01	OV
TCGA-29-1691-01	OV
TCGA-29-1766-01	OV
TCGA-29-1774-01	OV
TCGA-29-1778-01	OV
TCGA-29-1783-01	OV
TCGA-29-2425-01	OV
TCGA-29-A5NZ-01	OV
TCGA-30-1853-01	OV
TCGA-30-1866-01	OV
TCGA-31-1956-01	OV
TCGA-36-1569-01	OV
TCGA-36-1576-01	OV
TCGA-57-1586-01	OV
TCGA-59-2352-01	OV
TCGA-5X-AA5U-01	OV
TCGA-61-1721-01	OV
TCGA-61-1733-01	OV
TCGA-61-1741-01	OV
TCGA-61-1900-01	OV
TCGA-61-1911-01	OV
TCGA-61-1919-01	OV
TCGA-61-2009-01	OV
TCGA-61-2088-01	OV
TCGA-61-2098-01	OV
TCGA-61-2102-01	OV
TCGA-OY-A56Q-01	OV
